# Supplementary material for: Holocene vegetation reconstruction in the forest–steppe of Mongolia based on leaf waxes and macro-charcoals in soils
Source: Copernicus journal article supplement (doi:10.5194/egqsj-71-91-2022), 2022-05-24
Supplement: Supplementary file 1 [file egqsj-71-91-2022-supplement.zip]

| sample no.                                    | 29900.000 | 29899    | 29898    | 29897    | 29896    | 29895    | 29894    | 29893     | 29910  | 29909  | 29908   | 29907    | 29906    |
|-----------------------------------------------|-----------|----------|----------|----------|----------|----------|----------|-----------|--------|--------|---------|----------|----------|
| sample code                                   | B.1-08    | B.1-07   | B.1-06   | B.1-05   | B.1-04   | B.1-03   | B.1-02   | B.1-01    | C.1-08 | C.1-07 | C.1-06  | C.1-05   | C.1-04   |
| Depth                                         | 5-8 cm    | 16-19 cm | 19-38 cm | 42-45 cm | 45-72 cm | 72-78 cm | 78-96 cm | 96-100 cm | 0-3 cm | 3-4 cm | 4-25 cm | 25-32 cm | 36-43 cm |
| <i>n</i> -Alkane [ $\mu\text{g g}^{-1}$ soil] |           |          |          |          |          |          |          |           |        |        |         |          |          |
| nC17                                          | 0.46      | 0.00     | 0.68     | 0.00     | 0.00     | 0.00     | 0.00     | 0.37      | 0.00   | 0.00   | 0.00    | 0.00     | 0.00     |
| nC18                                          | 0.59      | 0.86     | 0.69     | 0.72     | 1.06     | 0.95     | 0.41     | 0.56      | 0.00   | 1.51   | 0.47    | 1.51     | 0.76     |
| nC19                                          | 0.57      | 0.43     | 0.50     | 0.33     | 0.56     | 0.53     | 0.22     | 0.32      | 0.19   | 0.62   | 0.25    | 0.80     | 0.30     |
| nC20                                          | 0.43      | 0.31     | 0.75     | 0.26     | 0.43     | 0.45     | 0.36     | 0.50      | 0.25   | 1.15   | 0.34    | 0.86     | 0.46     |
| nC21                                          | 0.43      | 0.16     | 0.19     | 0.14     | 0.23     | 0.29     | 0.13     | 0.14      | 0.21   | 0.44   | 0.23    | 0.57     | 0.21     |
| nC22                                          | 0.44      | 0.28     | 0.49     | 0.19     | 0.34     | 0.39     | 0.29     | 0.36      | 0.34   | 0.67   | 0.37    | 0.62     | 0.41     |
| nC23                                          | 0.59      | 0.23     | 0.23     | 0.19     | 0.31     | 0.40     | 0.20     | 0.20      | 0.33   | 0.40   | 0.28    | 0.47     | 0.31     |
| nC24                                          | 0.36      | 0.25     | 0.24     | 0.18     | 0.24     | 0.30     | 0.18     | 0.21      | 0.19   | 0.28   | 0.18    | 0.27     | 0.20     |
| nC25                                          | 0.69      | 0.19     | 0.17     | 0.13     | 0.20     | 0.29     | 0.12     | 0.17      | 0.27   | 0.27   | 0.23    | 0.30     | 0.25     |
| nC26                                          | 0.33      | 0.07     | 0.06     | 0.05     | 0.08     | 0.12     | 0.05     | 0.09      | 0.09   | 0.11   | 0.05    | 0.11     | 0.10     |
| nC27                                          | 1.70      | 0.16     | 0.20     | 0.15     | 0.20     | 0.59     | 0.10     | 0.26      | 0.35   | 0.39   | 0.25    | 0.42     | 0.49     |
| nC28                                          | 0.59      | 0.09     | 0.07     | 0.05     | 0.06     | 0.17     | 0.05     | 0.13      | 0.09   | 0.10   | 0.06    | 0.08     | 0.17     |
| nC29                                          | 5.69      | 0.11     | 0.38     | 0.18     | 0.25     | 1.65     | 0.16     | 0.46      | 0.54   | 0.49   | 0.37    | 0.92     | 1.10     |
| nC30                                          | 0.26      | 0.00     | 0.00     | 0.00     | 0.00     | 0.09     | 0.00     | 0.00      | 0.07   | 0.00   | 0.00    | 0.08     | 0.07     |
| nC31                                          | 9.33      | 0.12     | 0.76     | 0.19     | 0.38     | 2.44     | 0.27     | 0.67      | 0.92   | 0.85   | 0.67    | 1.68     | 2.13     |
| nC32                                          | 0.22      | 0.00     | 0.00     | 0.00     | 0.00     | 0.05     | 0.00     | 0.00      | 0.00   | 0.00   | 0.00    | 0.00     | 0.00     |
| nC33                                          | 3.19      | 0.00     | 0.20     | 0.00     | 0.07     | 0.62     | 0.10     | 0.20      | 0.62   | 0.40   | 0.33    | 0.91     | 1.09     |
| nC34                                          | 0.00      | 0.00     | 0.00     | 0.00     | 0.00     | 0.00     | 0.00     | 0.00      | 0.00   | 0.00   | 0.00    | 0.00     | 0.00     |
| nC35                                          | 0.81      | 0.00     | 0.00     | 0.00     | 0.00     | 0.00     | 0.00     | 0.00      | 0.00   | 0.00   | 0.00    | 0.00     | 0.00     |
| TAC                                           | 26.70     | 3.26     | 5.60     | 2.75     | 4.40     | 9.32     | 2.65     | 4.62      | 4.46   | 7.67   | 4.06    | 9.61     | 8.05     |

| 29905    | 29904    | 29903     | 29929    | 29930      | 29919    | 29920    | 29932    | 29933      | 29913   | 29914    | 29916   | 29917    |
|----------|----------|-----------|----------|------------|----------|----------|----------|------------|---------|----------|---------|----------|
| C.1-03   | C.1-02   | C.1-01    | P-F.1 Ah | P-F.1      | P-K-04   | P-K-06   | P-L-01   | P-L-02     | P-M-01  | P-M-01   | P-N-01  | P-N-02   |
| 46-50 cm | 50-70 cm | 95-135 cm | 0-3 cm   | 150-153 cm | 49-51 cm | 95-98 cm | 56-61 cm | 114-119 cm | 0-10 cm | 60-62 cm | 0-12 cm | 73-76 cm |
| 0.00     | 0.00     | 0.00      | 0.82     | 0.35       | 0.19     | 0.34     | 0.00     | 0.00       | 0.38    | 0.53     | 0.53    | 0.00     |
| 1.98     | 1.05     | 0.64      | 0.64     | 0.37       | 0.43     | 0.80     | 0.25     | 0.36       | 0.86    | 0.71     | 0.87    | 0.50     |
| 0.67     | 0.43     | 0.32      | 0.56     | 0.35       | 0.39     | 0.57     | 0.14     | 0.22       | 0.62    | 0.44     | 0.50    | 0.20     |
| 0.74     | 0.39     | 0.38      | 0.34     | 0.59       | 0.58     | 0.58     | 0.28     | 0.32       | 0.51    | 0.32     | 0.68    | 0.43     |
| 0.39     | 0.19     | 0.15      | 0.22     | 0.19       | 0.19     | 0.44     | 0.09     | 0.10       | 0.49    | 0.27     | 0.48    | 0.16     |
| 0.55     | 0.24     | 0.31      | 0.28     | 0.53       | 0.35     | 0.39     | 0.29     | 0.24       | 0.33    | 0.24     | 0.41    | 0.21     |
| 0.40     | 0.21     | 0.21      | 0.28     | 0.25       | 0.33     | 0.70     | 0.14     | 0.15       | 0.36    | 0.24     | 0.42    | 0.28     |
| 0.23     | 0.16     | 0.20      | 0.17     | 0.20       | 0.24     | 0.36     | 0.15     | 0.16       | 0.16    | 0.13     | 0.16    | 0.18     |
| 0.19     | 0.15     | 0.16      | 0.27     | 0.20       | 0.48     | 1.35     | 0.14     | 0.20       | 0.29    | 0.31     | 0.28    | 0.31     |
| 0.06     | 0.06     | 0.06      | 0.11     | 0.10       | 0.14     | 0.31     | 0.06     | 0.08       | 0.09    | 0.10     | 0.11    | 0.11     |
| 0.21     | 0.19     | 0.11      | 0.59     | 0.44       | 1.11     | 3.21     | 0.10     | 0.41       | 0.39    | 0.70     | 0.40    | 0.46     |
| 0.08     | 0.05     | 0.00      | 0.19     | 0.05       | 0.17     | 0.48     | 0.00     | 0.06       | 0.19    | 0.21     | 0.13    | 0.07     |
| 0.33     | 0.28     | 0.06      | 1.25     | 0.32       | 1.72     | 3.23     | 0.21     | 0.48       | 0.88    | 0.96     | 0.64    | 0.32     |
| 0.00     | 0.00     | 0.00      | 0.09     | 0.00       | 0.06     | 0.19     | 0.00     | 0.04       | 0.05    | 0.00     | 0.00    | 0.00     |
| 0.47     | 0.57     | 0.53      | 2.01     | 0.45       | 3.57     | 5.77     | 0.43     | 0.87       | 0.95    | 1.26     | 1.14    | 0.53     |
| 0.00     | 0.00     | 0.00      | 0.00     | 0.00       | 0.06     | 0.13     | 0.00     | 0.03       | 0.00    | 0.00     | 0.00    | 0.00     |
| 0.15     | 0.30     | 0.00      | 0.74     | 0.16       | 1.48     | 2.11     | 0.14     | 0.28       | 0.26    | 0.23     | 0.50    | 0.20     |
| 0.00     | 0.00     | 0.00      | 0.00     | 0.00       | 0.00     | 0.00     | 0.00     | 0.00       | 0.00    | 0.00     | 0.00    | 0.00     |
| 0.00     | 0.00     | 0.00      | 0.00     | 0.00       | 0.00     | 0.00     | 0.00     | 0.00       | 0.00    | 0.00     | 0.00    | 0.00     |
| 6.47     | 4.26     | 3.13      | 8.55     | 4.55       | 11.48    | 20.95    | 2.41     | 4.00       | 6.79    | 6.65     | 7.25    | 3.95     |

| 29924  | 29921    | 29922    | 29923      | 29890  | 29887    | 29888    | 29889    | 29926      |
|--------|----------|----------|------------|--------|----------|----------|----------|------------|
| P-R-04 | P-R-01   | P-R-02   | P-R-03     | P-S-04 | P-S-01   | P-S-02   | P-S-03   | P-09-01-02 |
| 0-7 cm | 41-50 cm | 60-74 cm | 125-140 cm | 0-5 cm | 20-22 cm | 33-40 cm | 60-63 cm | 0-3 cm     |
| 0.78   | 0.00     | 0.00     | 0.00       | 0.83   | 0.00     | 1.06     | 0.49     | 0.63       |
| 1.71   | 1.36     | 0.70     | 0.65       | 1.77   | 0.62     | 0.89     | 0.77     | 0.64       |
| 0.51   | 0.57     | 0.31     | 0.23       | 0.68   | 0.43     | 0.65     | 0.45     | 0.50       |
| 0.33   | 0.44     | 0.25     | 0.26       | 1.48   | 0.92     | 1.37     | 0.46     | 0.66       |
| 0.18   | 0.30     | 0.25     | 0.10       | 0.62   | 0.45     | 1.41     | 0.35     | 0.36       |
| 0.21   | 0.36     | 0.41     | 0.27       | 0.66   | 0.93     | 1.50     | 0.25     | 0.56       |
| 0.22   | 0.28     | 0.31     | 0.16       | 0.61   | 0.59     | 2.60     | 0.44     | 0.42       |
| 0.11   | 0.15     | 0.22     | 0.15       | 0.50   | 0.43     | 1.42     | 0.17     | 0.37       |
| 0.18   | 0.15     | 0.18     | 0.09       | 1.29   | 0.71     | 5.56     | 0.65     | 0.70       |
| 0.06   | 0.07     | 0.06     | 0.05       | 0.32   | 0.26     | 1.73     | 0.10     | 0.28       |
| 0.46   | 0.19     | 0.19     | 0.07       | 3.32   | 1.81     | 18.26    | 1.87     | 2.09       |
| 0.12   | 0.06     | 0.04     | 0.01       | 0.28   | 0.34     | 1.53     | 0.15     | 0.68       |
| 0.83   | 0.25     | 0.25     | 0.16       | 1.96   | 2.09     | 11.99    | 1.25     | 2.51       |
| 0.00   | 0.00     | 0.00     | 0.00       | 0.09   | 0.00     | 0.49     | 0.00     | 0.08       |
| 1.15   | 0.74     | 0.41     | 0.34       | 2.07   | 2.80     | 19.66    | 1.65     | 2.89       |
| 0.00   | 0.00     | 0.00     | 0.00       | 0.00   | 0.00     | 0.35     | 0.00     | 0.00       |
| 0.38   | 0.16     | 0.16     | 0.15       | 0.68   | 0.79     | 5.87     | 0.36     | 1.56       |
| 0.00   | 0.00     | 0.00     | 0.00       | 0.00   | 0.00     | 0.00     | 0.00     | 0.00       |
| 0.00   | 0.00     | 0.00     | 0.00       | 0.00   | 0.00     | 0.00     | 0.00     | 0.00       |
| 7.22   | 5.08     | 3.74     | 2.70       | 17.15  | 13.17    | 76.34    | 9.41     | 14.92      |

|                       |                                 |                             |                               |                |                   |
|-----------------------|---------------------------------|-----------------------------|-------------------------------|----------------|-------------------|
| <i>Larix sibirica</i> | <i>Potentilla<br/>fruticosa</i> | <i>Lonicera<br/>altaica</i> | <i>Betula<br/>platyphylla</i> | <i>Poaceae</i> | <i>Salix ssp.</i> |
|-----------------------|---------------------------------|-----------------------------|-------------------------------|----------------|-------------------|

***n* -Alkane [ $\mu\text{g g}^{-1}$  plant material]**

|      |       |         |        |        |        |       |
|------|-------|---------|--------|--------|--------|-------|
| nC21 | 0.19  | 0.51    | 0.00   | 0.17   | 0.16   | 0.94  |
| nC22 | 0.06  | 0.00    | 0.00   | 0.12   | 0.02   | 0.43  |
| nC23 | 1.05  | 2.36    | 0.92   | 0.98   | 2.26   | 26.37 |
| nC24 | 0.21  | 2.03    | 0.13   | 2.39   | 0.21   | 0.98  |
| nC25 | 1.51  | 8.71    | 1.80   | 4.08   | 5.86   | 17.69 |
| nC26 | 0.15  | 4.75    | 1.27   | 2.65   | 0.29   | 1.02  |
| nC27 | 5.32  | 78.97   | 5.17   | 177.02 | 10.42  | 28.28 |
| nC28 | 0.16  | 5.16    | 2.53   | 3.62   | 0.69   | 1.25  |
| nC29 | 3.71  | 130.21  | 289.82 | 30.65  | 49.54  | 12.85 |
| nC30 | 0.58  | 6.95    | 9.48   | 1.01   | 3.32   | 0.21  |
| nC31 | 1.77  | 652.76  | 177.82 | 24.38  | 138.49 | 5.37  |
| nC32 | 0.44  | 5.47    | 0.00   | 0.44   | 2.65   | 0.19  |
| nC33 | 0.74  | 302.15  | 2.68   | 1.28   | 31.91  | 0.84  |
| nC34 | 1.69  | 0.00    | 1.68   | 0.00   | 0.00   | 0.00  |
| nC35 | 2.13  | 0.00    | 0.00   | 0.00   | 0.79   | 0.00  |
| TAC  | 19.71 | 1200.03 | 493.29 | 248.78 | 246.63 | 96.41 |
