# Supplementary material for: Holocene vegetation reconstruction in the forest–steppe of Mongolia based on leaf waxes and macro-charcoals in soils
Source: Copernicus journal article supplement (doi:10.5194/egqsj-71-91-2022), 2022-05-24
Supplement: Supplementary file 2 [file egqsj-71-91-2022-supplement.zip]

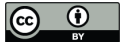

*Supplement of*

**Holocene vegetation reconstruction in the forest–steppe of Mongolia based on leaf waxes and macro-charcoals in soils**

**Marcel Lerch et al.**

*Correspondence to:* Michael Klinge (mklinge1@gwdg.de)

- [egqsj-71-91-2022-supplement-title-page.pdf](#)
- [Supplement 1.pdf](#)
- [Supplement 2.pdf](#)

The copyright of individual parts of the supplement might differ from the article licence.
