# Supplementary material for: Holocene vegetation reconstruction in the forest–steppe of Mongolia based on leaf waxes and macro-charcoals in soils
Source: Copernicus journal article supplement (doi:10.5194/egqsj-71-91-2022), 2022-05-24
Supplement: Supplementary file 3 [file egqsj-71-91-2022-supplement.zip]

|               | <b>Sample No.<br/>Code</b> | <b>P-B 17 cm<br/>BM-04</b> | <b>P-B 44 cm<br/>BM-03</b> | <b>P-B 75 cm<br/>BM-02</b> | <b>P-B 98 cm<br/>BM-01</b> | <b>P-C 12 cm<br/>BM-09</b> | <b>P-C 28 cm<br/>BM-08</b> | <b>P-C 40 cm<br/>BM-07</b> | <b>P-C 48 cm<br/>BM-06</b> |
|---------------|----------------------------|----------------------------|----------------------------|----------------------------|----------------------------|----------------------------|----------------------------|----------------------------|----------------------------|
| Wood          | Sample quantity            | 69                         | 163                        | 98                         | 27                         | 37                         | 32                         | 18                         | 87                         |
| Leaf          | Sample quantity            | 24                         | 24                         | 40                         | 6                          | 14                         | 6                          | 5                          | 15                         |
| Grass         | Sample quantity            | 24                         | 68                         | 103                        | 28                         | 28                         | 22                         | 15                         | 83                         |
| Others        | Sample quantity            | 35                         | 83                         | 72                         | 13                         | 33                         | 14                         | 25                         | 58                         |
| Concentration | [particles/cm3]            | 152                        | 338                        | 313                        | 74                         | 112                        | 74                         | 63                         | 243                        |

| P-C 67 cm<br>BM-05 | P-E 152 cm<br>BM-10 | P-F 151 cm<br>BM-32 | P-J 130 cm<br>BM-11 | P-J 170 cm<br>BM-12 | P-K 20 cm<br>BM-17 | P-K 50 cm<br>BM-18 | P-K 96 cm<br>BM-19 | P-L 58 cm<br>BM-21 | P-L 116 cm<br>BM-22 | P-M 61 cm<br>BM-23 |
|--------------------|---------------------|---------------------|---------------------|---------------------|--------------------|--------------------|--------------------|--------------------|---------------------|--------------------|
| 77                 | 10                  | 19                  | 2                   | 2                   | 19                 | 68                 | 24                 | 14                 | 9                   | 153                |
| 33                 | 4                   | 1                   | 0                   | 0                   | 2                  | 3                  | 9                  | 2                  | 2                   | 37                 |
| 52                 | 13                  | 14                  | 1                   | 1                   | 7                  | 16                 | 66                 | 13                 | 12                  | 33                 |
| 45                 | 7                   | 12                  | 4                   | 1                   | 7                  | 9                  | 18                 | 7                  | 10                  | 83                 |
| 207                | 34                  | 46                  | 7                   | 4                   | 35                 | 96                 | 117                | 36                 | 33                  | 306                |

| P-N 75 cm<br>BM-24 | P-R 45 cm<br>BM-25 | P-R 68 cm<br>BM-26 | P-R 130 cm<br>BM-27 | P-S 21 cm<br>BM-28 | P-S 37 cm<br>BM-29 | P-S 61 cm<br>BM-30 | P-09 38 cm<br>BM-31 |  |
|--------------------|--------------------|--------------------|---------------------|--------------------|--------------------|--------------------|---------------------|--|
| 29                 | 18                 | 63                 | 6                   | 68                 | 38                 | 38                 | 41                  |  |
| 10                 | 6                  | 12                 | 2                   | 18                 | 11                 | 13                 | 23                  |  |
| 38                 | 21                 | 46                 | 9                   | 28                 | 7                  | 29                 | 37                  |  |
| 44                 | 14                 | 32                 | 5                   | 20                 | 12                 | 27                 | 29                  |  |
| 121                | 59                 | 153                | 22                  | 134                | 68                 | 107                | 130                 |  |
